# Supplementary material
Source: PubMed Central journal article supplement (PMC3003297)
Supplement: NIHMS252890-supplement-Supp1.pdf [file NIHMS252890-supplement-Supp1.pdf]

## **SUPPLEMENTAL MATERIALS**

### **Supplemental methods:**

#### **Immunohistochemistry**

The heart specimens were fixed with formalin, embedded in paraffin, and sectioned at 6- $\mu$ m thickness. Formalin-fixed paraffin-embedded sections were deparaffinized and rehydrated in PBS. Pretreatments included microwave antigen retrieval in a 10 mmol/L citrate buffer for 20 min. Immunohistochemical staining was performed with the ImmunoCruz staining system (streptavidin-biotin peroxidase method, Santa Cruz Biotechnology), and sections were counterstained with hematoxylin. Bcl-xL rabbit polyclonal antibody (BD Biosciences), cleaved caspase-3 rabbit polyclonal antibody (Cell Signaling Technology), 8-OHdG goat polyclonal antibody (Chemicon), FKHR (FoxO1) rabbit monoclonal antibody (Epitomics), and Troponin T mouse monoclonal antibody (Thermo scientific) were used.

#### **Quantitative Reverse Transcription-PCR (qRT-PCR)**

Total RNA was extracted from cultured cardiac myocytes with TRIzol (Invitrogen). cDNA was synthesized with the RETROscript kit (Ambion) following the manufacturer's instructions. Real time-PCR was carried out as described previously.<sup>1</sup> The following primer pairs were used –

FoxO1:        Sense – CAGATCTACGAGTGGATGGT  
                  Antisense – ACTTGCTGTGTAGGGACAGA

Sirt1:         Sense – CTC CTG TTG ACC GAT GGA CT  
                  Antisense – GCG TCA TAT CAT CCA GCT CA

GAPDH:       Sense – GAGCTGAACGGGAAGCTCACT  
                  Antisense – TTGTCATACCAGGAAATGAGC

#### **Reporter Gene Assays**

Reporter gene assays were conducted with a 3x insulin responsive sequence (IRS) promoter-luciferase reporter (3 x IRS-Luc)<sup>2</sup> as described previously<sup>3</sup>. To generate 3 x IRS-Luc, the two oligonucleotides

CTTCAAATAAGTTTGTGGCTTCAAATAAGTTTGTGGCTTCAAATAAGTTTGT  
TTTGCA and

AGCTTGCAAACAACTTATTTGAAGCAAACAACTTATTTGAAGCAAACAAAC  
TTATTTGAAGAGCT

were annealed and ligated into the SacI, HindIII sites of the pGL3-basic vector (Promega, Madison).

### **Fluorescence Microscopic Measurement of ROS Production**

We used 5-(and-6)-chloromethyl-2', 7'-dichloro-dihydrofluorescein diacetate (CM-H2DCFDA, Molecular Probes) to detect intracellular generation of reactive oxygen species (ROS). Cardiac myocytes were loaded with 5 µmol/L CM-H2DCFDA for 15 min in the dark. After loading, cells were washed with warm HBSS without phenol red. During loading, the acetate groups on CM-H2DCFDA are removed by intracellular esterase, trapping the probe inside the myocyte. Cells loaded with CM-H2DCF were treated with chelerythrine (10 µmol/L) and analyzed by fluorescence microscopy. Production of ROS can be measured by changes in fluorescence due to intracellular production of CM-DCF (5-(and-6)-chloromethyl-2', 7'-dichlorofluorescein) caused by oxidation of CM-H2DCF. CM-DCF fluorescence was measured at an excitation wavelength of 480 nm and an emission wavelength of 520 nm.

**Supplemental Table S1. Organ weight of cardiac specific Sirt1 knockout mouse**

|                                | <b>Cardiac specific Sirt1 -/-<br/>(N=3)</b> | <b>Wild type<br/>(N=5)</b> |
|--------------------------------|---------------------------------------------|----------------------------|
| <b>Heart weight/ BW, mg/ g</b> | <b>5.2±0.3</b>                              | <b>5.1±0.2</b>             |
| <b>LV weight/ BW, mg/ g</b>    | <b>3.9±0.1</b>                              | <b>3.8±0.1</b>             |
| <b>Lung weight/ BW, mg/ g</b>  | <b>5.9±0.1</b>                              | <b>5.9±0.2</b>             |
| <b>Liver weight/ BW, mg/ g</b> | <b>52.3±3.9</b>                             | <b>48.5±0.9</b>            |

Values are mean ± SEM; BW, body weight; LV, left ventricle.

**Supplemental Table S2 Baseline characteristics of Tg-Sirt1 and NTg control mice**

|            | <b>LVSP</b> | <b>LVEDP</b> | <b>LVDP</b> | <b>+ dP/dt</b> | <b>- dP/dt</b> | <b>HR</b> |
|------------|-------------|--------------|-------------|----------------|----------------|-----------|
| <b>NTg</b> | 90.8±15.2   | 4.8±0.8      | 86±14.7     | 2620±465       | 1360±240       | 273±46    |
| <b>Tg</b>  | 106±7.4     | 5.6±0.7      | 100.4±7.9   | 3160±444       | 1660±60        | 274±29    |

NTg, non-transgenic mice; Tg, transgenic mice with cardiac specific overexpression of Sirt1

LVSP, left ventricular systolic pressure (mmHg);

LVEDP, left ventricular end-diastolic pressure (mmHg);

LVDP, left ventricular developed pressure (mmHg); HR, heart rate (beats/min)

# Supplemental Fig. S1

**A**

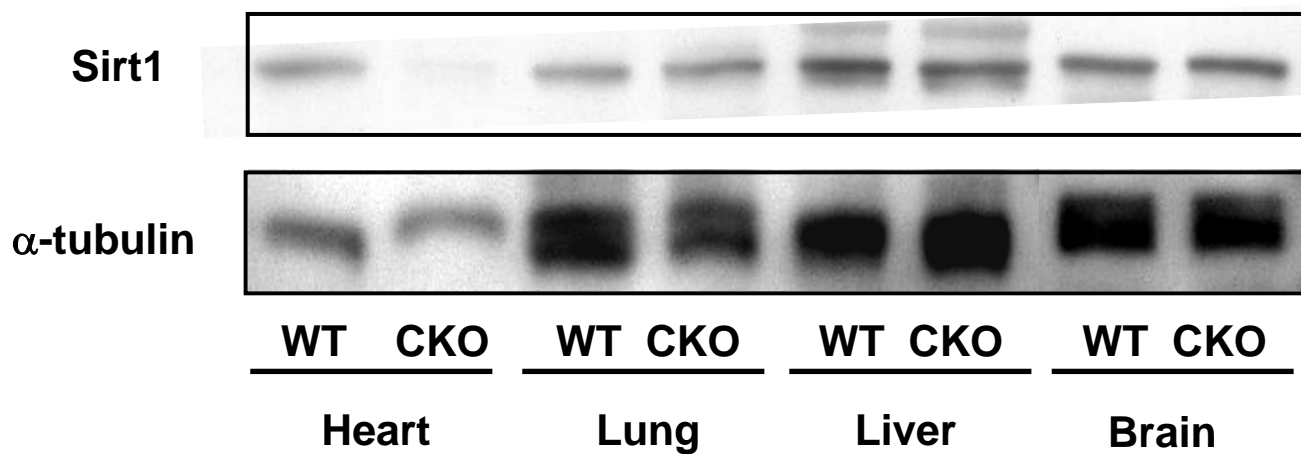

**B**

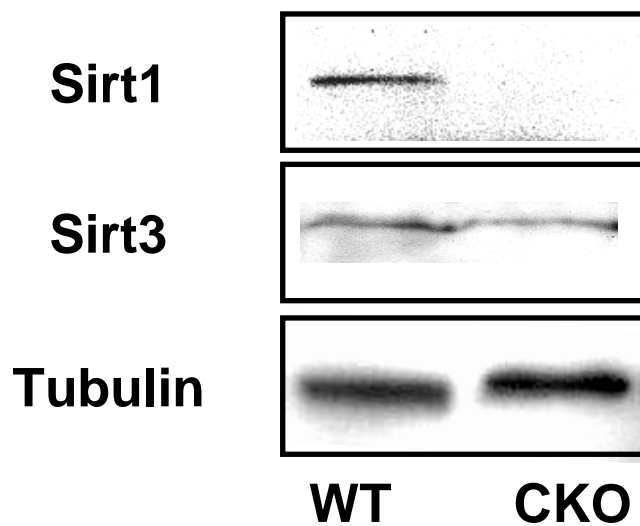

# Supplemental Fig. S2

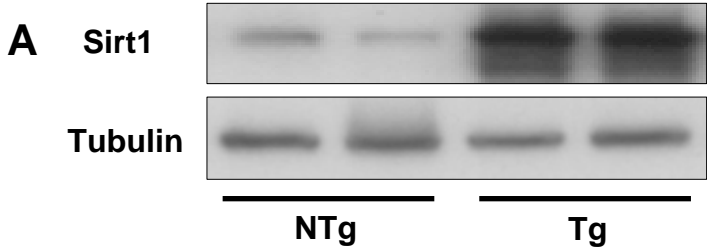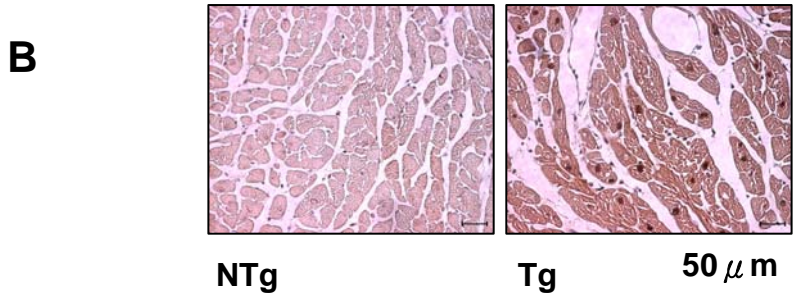

# Supplemental Fig. S3

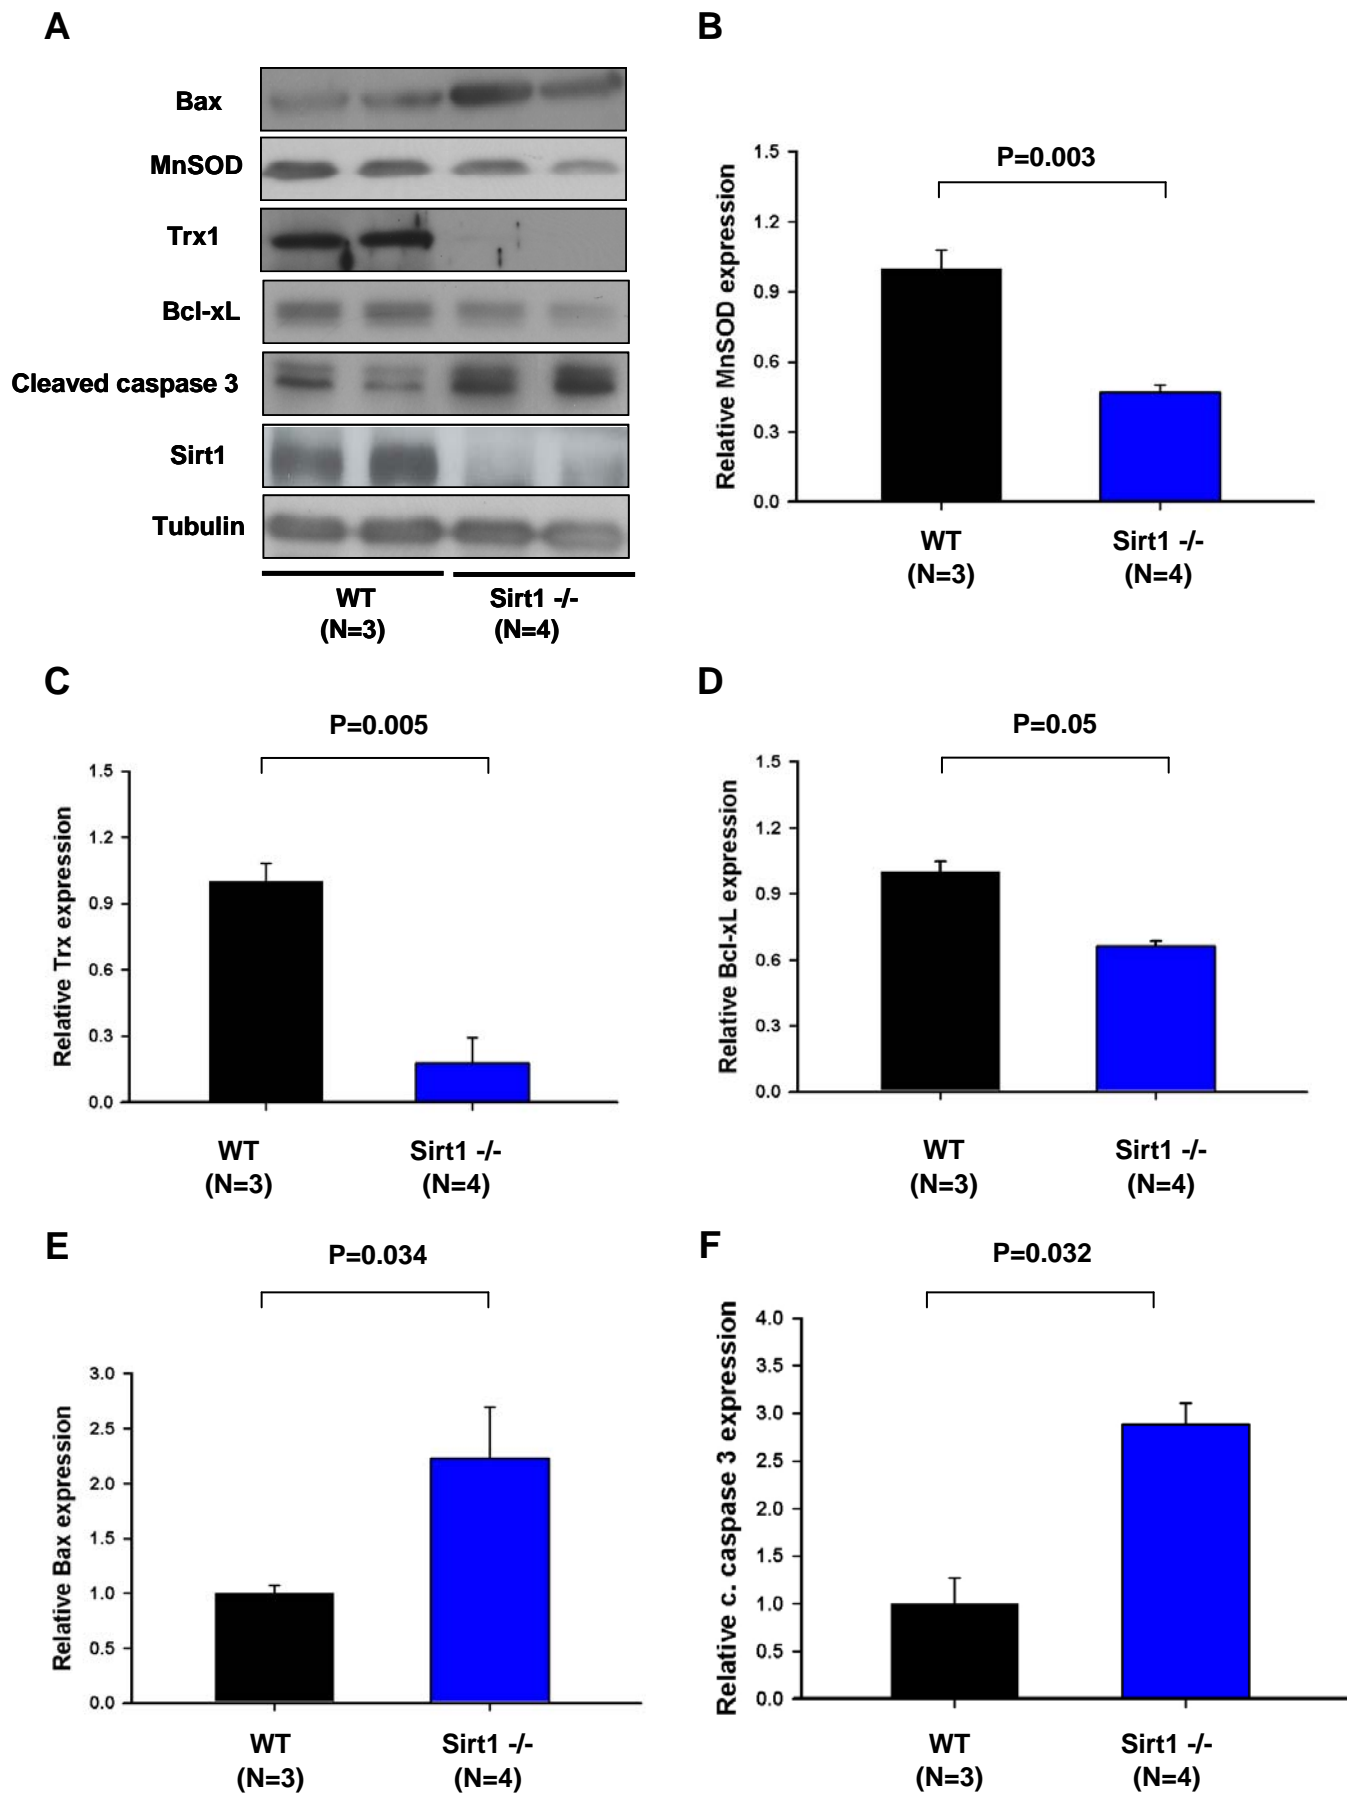

# Supplemental Fig. S4

WT

c-Sirt1 -/-

Sham

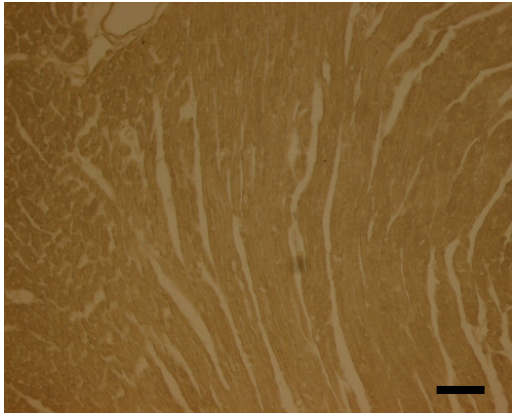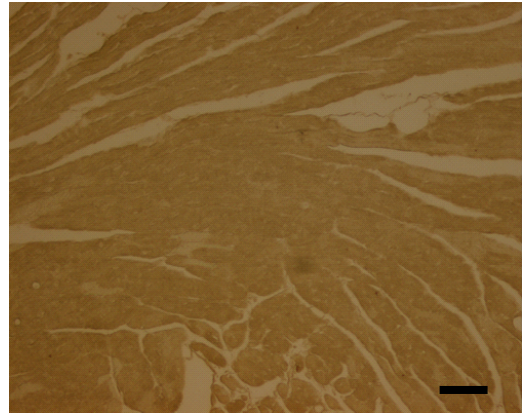

I/R

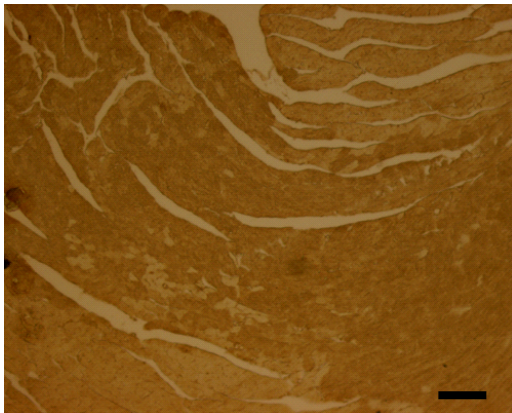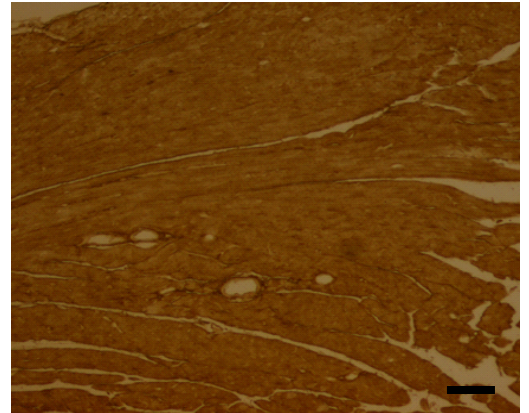



# Supplemental Fig. S5

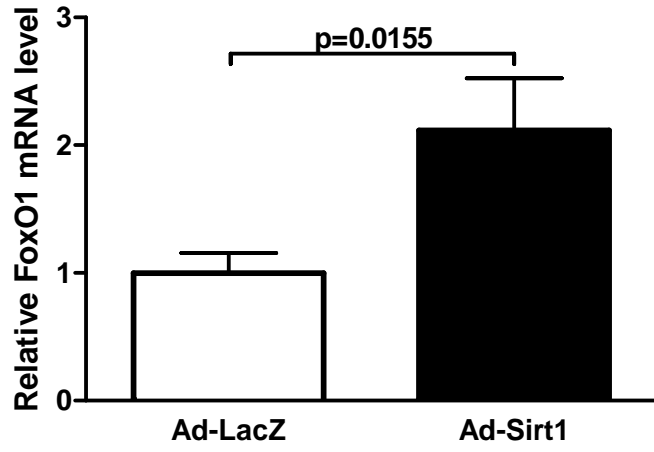

# Supplemental Fig. S6

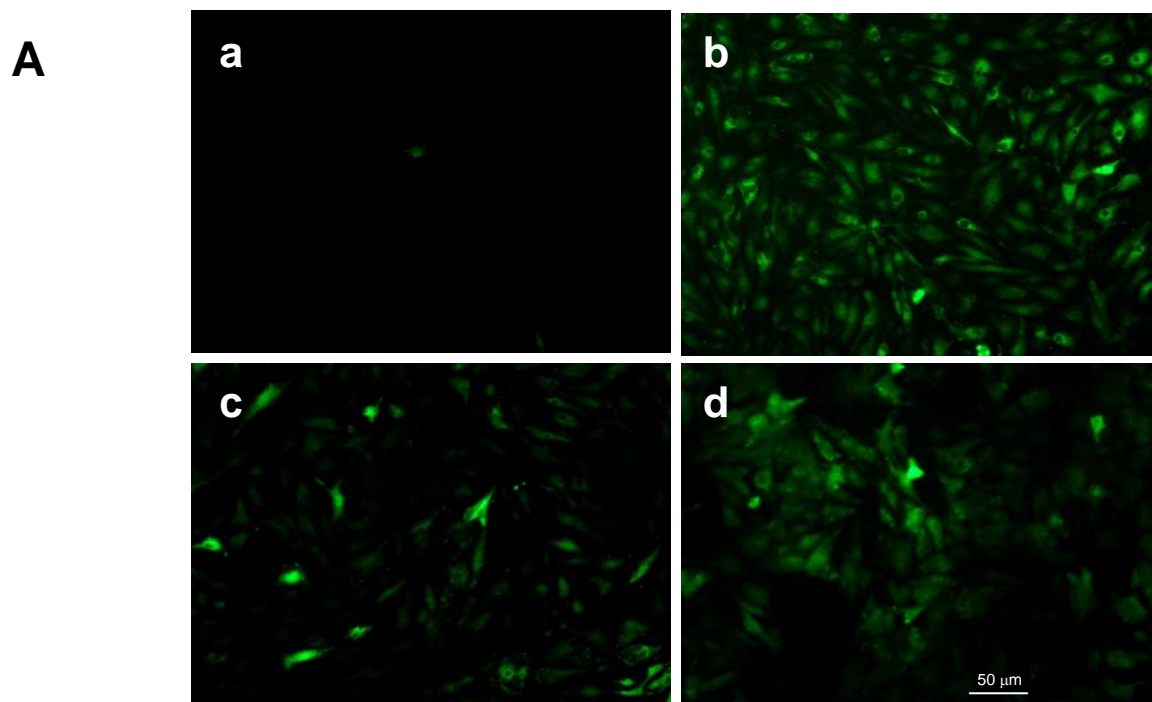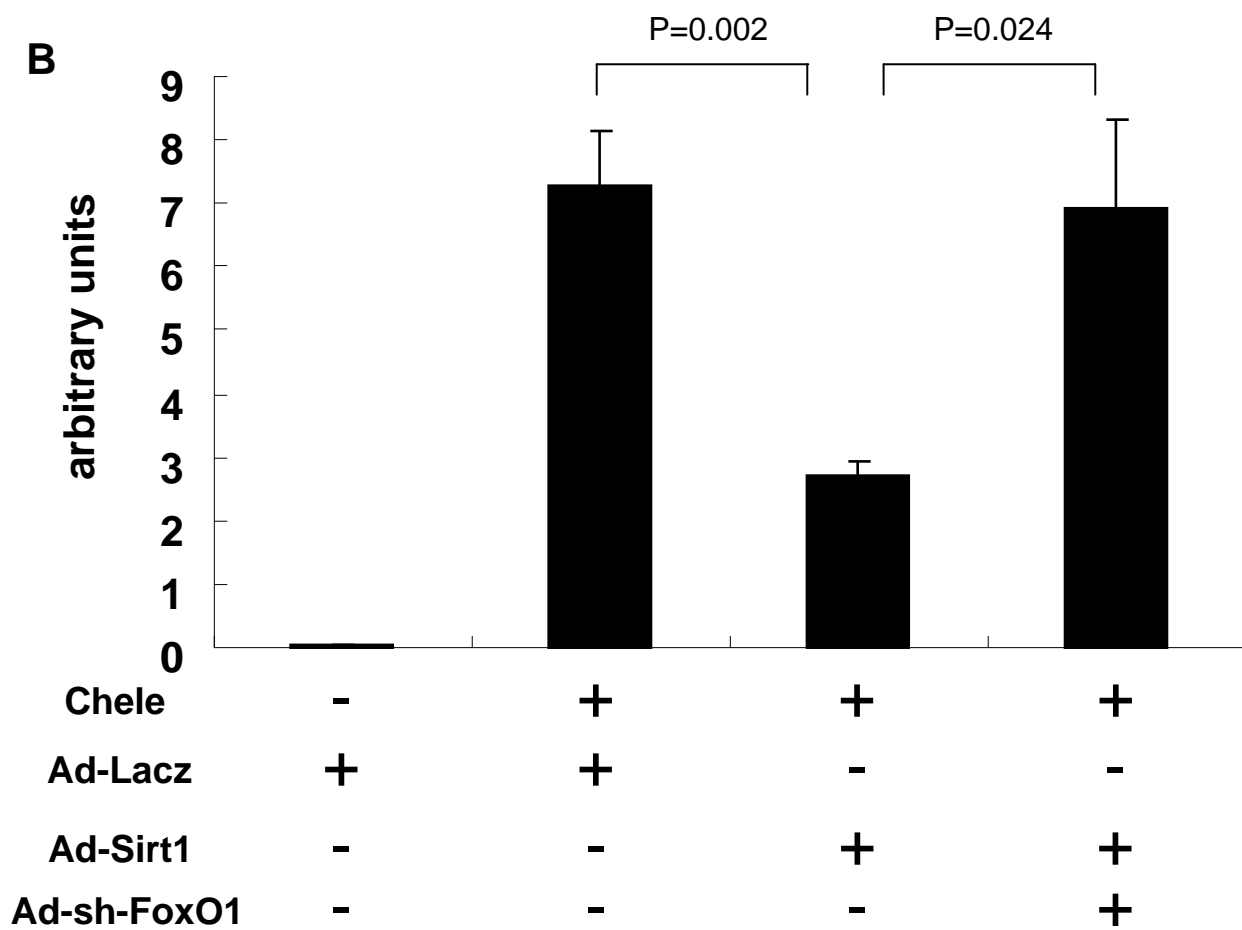

### Figure legends for supplemental Figures

Supplemental Figure S1 Homogenates were prepared from indicated organs (A) and the heart (B) in wild type (WT) or cardiac specific Sirt1  $-/-$  (CKO) mice and immunoblot analyses were conducted with anti-Sirt1, anti-Sirt3, and anti- $\alpha$ -tubulin antibodies.

Supplemental Figure S2 Expression of Sirt1 in Tg-Sirt1. (A) Homogenates were prepared from Tg-Sirt1 (Tg) and non-transgenic (NTg) hearts. The level of Sirt1 in the heart was evaluated by immunoblot analysis. (B) The level of Sirt1 expression in the myocardium was evaluated with immunostaining with anti-Sirt1 antibody.

Supplemental Figure S3 Heart homogenates were prepared from the ischemic area in wild type (WT) or cardiac specific Sirt1  $-/-$  mice subjected to I/R. Expression of Bax, MnSOD, Trx1, Bcl-xL, cleaved caspase-3, Sirt1 and tubulin was evaluated by immunoblots. (A) Representative immunoblots are shown. (B-F) The quantitative and statistical analyses of the immunoblots are shown. The relative expression of MnSOD (B), Trx1 (C), Bcl-xL (D), Bax (E) and cleaved caspase-3 (c. caspase 3) (F) in Sirt1  $-/-$  versus WT is shown. The expression level of WT mice is expressed as 1.

Supplemental Figure S4 Representative immunostaining of 8-OHdG in left ventricular myocardial sections obtained from wild type (WT) and cardiac specific Sirt1  $-/-$  mice subjected to either sham operation or I/R.

Supplemental Figure S5 Cultured cardiac myocytes were transduced with either adenovirus harboring LacZ (Ad-LacZ) or adenovirus harboring Sirt1 (Ad-Sirt1). After forty-eight hours, the level of FoxO1 mRNA was evaluated with quantitative PCR analyses. GAPDH was used as an internal control. n=4 each.

Supplemental Figure S6 Cultured cardiac myocytes were transduced with Ad-LacZ, Ad-Sirt1 and/or Ad-sh-FoxO1 as indicated. The total amount of adenovirus was 10MOI in each sample. After forty-eight hours, myocytes were subjected to DFCDA staining as described in the Method section in the presence or absence of chelerythrine (10  $\mu$ mol/L).

## References

1. Hsu CP, Oka S, Shao D, Hariharan N, Sadoshima J. Nicotinamide phosphoribosyltransferase regulates cell survival through NAD<sup>+</sup> synthesis in cardiac myocytes. *Circ Res.* 2009;105:481-491.
2. Tang ED, Nunez G, Barr FG, Guan KL. Negative regulation of the forkhead transcription factor FKHR by Akt. *J Biol Chem.* 1999;274:16741-16746.
3. Ago T, Liu T, Zhai P, Chen W, Li H, Molkentin JD, Vatner SF, Sadoshima J. A redox-dependent pathway for regulating class II HDACs and cardiac hypertrophy. *Cell.* 2008;133:978-993.
